# Supplementary material
Source: MDPI journal article supplement (https://www.mdpi.com/2071-1050/13/7/3806)
Supplement: s1 [file s1]

**Table S1.** Sample data collection localities in the western Gurage socio-ecological production landscape.

| Jefoure road       | District                | Agro-ecological zones | Road length | Road width | Management (quality) | Settlement history |
|--------------------|-------------------------|-----------------------|-------------|------------|----------------------|--------------------|
| Aegera             | Gumer                   | Cool moist            | Short       | Medium     | Good                 | Old                |
| Agured/ Ener Gedam | Tepid sub-humid         | Tepid sub-humid       | Short       | Narrow     | Medium               | Old                |
| Boqeta             | Abesghe                 | Warm                  | Short       | Medium     | Low                  | New                |
| Cheret             | Mihurena Aklil          | Tepid sub-humid       | Long        | Wide       | Good                 | New                |
| Debesa             | Ezha                    | Cool moist            | Long        | Medium     | Medium               | Old                |
| Demberi            | Enemoherna Ener         | Tepid sub-humid       | Long        | Wide       | Good                 | Old                |
| Desene             | Ezha                    | Tepid sub-humid       | Medium      | Medium     | Medium               | Old                |
| Geharad            | Enemoherna Ener         | Tepid sub-humid       | Medium      | Wide       | Good                 | Old                |
| Inagera            | Cheha                   | Tepid sub-humid       | Long        | Medium     | Good                 | Old                |
| Kentuat            | Gedebano Gutazer Wolene | Cool moist            | Long        | Narrow     | Low                  | New                |
| Luqe               | Cheha                   | Warm                  | Short       | Medium     | Medium               | New                |
| Mamochema          | Ezha                    | Cool moist            | Medium      | Wide       | Medium               | Old                |
| Yadezer Yezhiera   | Mihurena Aklil          | Cool moist            | Medium      | Wide       | Medium               | Old                |

**Table S2.** Sample interviewed participants profile in selected Jefoure roads ( $N = 28$ ).

| Sex        | Male       | Female            |                |                    |                   |  |
|------------|------------|-------------------|----------------|--------------------|-------------------|--|
| Number     | 20         | 8                 |                |                    |                   |  |
| Age        | <20        | 20–40             | 40–60          | >60                |                   |  |
| Number     | 3          | 3                 | 14             | 8                  |                   |  |
| Religion   | Christian  | Muslim            |                |                    |                   |  |
| Number     | 20         | 8                 |                |                    |                   |  |
| Occupation | Farmer     | Religious servant | Crafting       | Kebele chairperson | Development agent |  |
| Number     | 18         | 2                 | 2              | 4                  | 2                 |  |
| Education  | Illiterate | Religious school  | Primary school | High school        | College           |  |
| Number     | 8          | 3                 | 8              | 5                  | 4                 |  |

**Table S3.** Sample focus group discussions participants profile in selected Jefoure roads ( $N = 98$ ).

| Jefoure road | Sex  |        | Age |     | Occupation |                   |       | Local Role        |       |                     |                   |
|--------------|------|--------|-----|-----|------------|-------------------|-------|-------------------|-------|---------------------|-------------------|
|              | Male | Female | <40 | >40 | Farmer     | Development agent | Elder | Religious servant | Youth | Kebele chair person | Development agent |
| Agera        | 5    | 3      | 2   | 6   | 8          |                   | 4     | 1                 | 2     | 1                   |                   |
| Abiret       | 4    | 3      | 3   | 4   | 6          | 1                 | 2     | 1                 | 2     | 1                   | 1                 |
| Anzere       | 5    | 2      | 4   | 3   | 3          | 2                 | 4     |                   | 1     | 1                   | 1                 |
| Boqeta       | 5    | 2      | 2   | 7   | 6          | 1                 | 3     |                   | 2     | 1                   | 1                 |
| Cheret       | 4    | 2      | 2   | 4   | 5          | 1                 | 2     | 1                 | 1     | 1                   | 1                 |
| Cheza        | 4    | 2      | 2   | 4   | 5          | 1                 | 3     |                   | 1     | 1                   | 1                 |
| Debesa       | 7    | 2      | 2   | 7   | 8          | 1                 | 5     | 1                 | 1     | 1                   | 1                 |
| Desene       | 6    | 2      | 3   | 5   | 6          | 2                 | 4     |                   | 2     | 1                   | 1                 |
| Ener Gedam   | 5    | 2      | 2   | 5   | 4          | 1                 | 2     | 1                 | 1     | 1                   | 1                 |
| Geharad      | 6    | 3      | 2   | 7   | 8          | 1                 | 4     | 1                 | 1     | 1                   | 1                 |
| Inagera      | 5    | 2      | 2   | 5   | 5          | 1                 | 4     | 1                 | 1     |                     |                   |
| Kotergedera  | 6    | 2      | 2   | 6   | 7          | 1                 | 4     | 1                 | 1     | 1                   | 1                 |
| Luqe         | 7    | 2      | 4   | 5   | 6          | 2                 | 3     |                   | 2     | 1                   | 1                 |

**Table S4.** Reporting categories of NCP with the indicator for assessment by Jefoure roads (based on [2]).

| Categories             | NCP reporting categories                               | Indicator for assessment                                                                                                     |
|------------------------|--------------------------------------------------------|------------------------------------------------------------------------------------------------------------------------------|
| <b>Material NCP</b>    | Transportation                                         | A route for natural land transport mode for humans, animal, and vehicles                                                     |
|                        | Grain threshing floor                                  | Enables places for a threshing floor                                                                                         |
|                        | Feed                                                   | Places for production of feed (fodder) for domesticated animals                                                              |
|                        | Materials                                              | Places for production of materials for construction                                                                          |
|                        | Energy                                                 | Places for production of biomass-based fuels                                                                                 |
| <b>Nonmaterial NCP</b> | Learning and inspiration                               | Places for local council assembly meeting by judicial services and meeting places for various groups for sharing experiences |
|                        | Physical and psychological experiences                 | Places for playing traditional games, spending leisure time and recreations                                                  |
|                        | Supporting identities                                  | Landscape for spiritual and religious activities                                                                             |
|                        |                                                        | Landscape for social services (such as a wedding, mourning ceremonies)                                                       |
|                        |                                                        | Landscape creating an identity, sense of place, and bequest values                                                           |
| <b>Regulating NCP</b>  | Habitat creation and maintenance                       | Provide habitats for the remaining vascular plant species                                                                    |
|                        | Regulation of climate                                  | Biological carbon storage and sequestration                                                                                  |
|                        | Regulation of freshwater quantity                      | Regulation of flow to water-dependent natural habitats                                                                       |
|                        | Physical protection of soil and sediments from erosion | Long-term maintenance of soil structure and processes                                                                        |

**Table S5.** Trends in the uses of ecosystem services in different Jefoure roads.

| NCP Categories          | Services/ Sites          | 1 | 2 | 3 | 4 | 5 | 6 | 7 | 8 | 9 | 10 | 11 | 12 | 13 | Decrease (%) | No change (%) | Increase (%) |
|-------------------------|--------------------------|---|---|---|---|---|---|---|---|---|----|----|----|----|--------------|---------------|--------------|
| <b>Material NCP</b>     | Vehicle transport        | ↑ | ↑ | ↑ | ↑ | ↑ | ↑ | ↑ | ↑ | ↑ | ↑  | ↑  | ↑  | ↑  | 0            | 0             | 100          |
|                         | Grazing land             | — | — | ↓ | — | — | — | — | — | — | —  | ↓  | —  | —  | 13           | 87            | 0            |
|                         | Grain threshing floor    | ↓ | ↓ | ↓ | ↓ | ↓ | ↓ | ↓ | — | — | ↓  | —  | —  | —  | 61           | 39            | 0            |
|                         | Production of timber     | ↑ | ↑ | ↑ | ↑ | ↑ | ↑ | ↑ | — | — | —  | —  | ↓  | ↓  | 18           | 30            | 52           |
| <b>Non-Material NCP</b> | Traditional religion     | ↓ | ↓ | ↓ | ↓ | ↓ | ↓ | ↓ | ↓ | ↓ | ↓  | ↓  | ↓  | ↓  | 100          | 0             | 0            |
|                         | Christianity & Muslim    | — | — | — | — | — | — | — | — | — | —  | —  | —  | —  | 0            | 100           | 0            |
|                         | Judicial services        | ↓ | ↓ | — | — | — | — | — | — | ↑ | —  | —  | —  | ↓  | 27           | 67            | 7            |
|                         | Meeting place            | — | ↓ | — | — | — | ↓ | — | — | ↑ | ↑  | ↓  | —  | ↓  | 40           | 47            | 13           |
|                         | Social services          | ↓ | — | — | ↓ | — | — | — | — | ↓ | ↑  | ↓  | —  | ↓  | 40           | 53            | 7            |
|                         | Recreational values      | ↓ | ↓ | ↓ | — | — | — | — | — | ↑ | ↑  | ↓  | —  | ↑  | 40           | 40            | 20           |
|                         | Aesthetic value          | ↑ | ↓ | ↓ | — | — | — | — | — | ↑ | —  | ↓  | —  | ↑  | 27           | 53            | 20           |
|                         | Identity                 | — | ↓ | ↓ | — | — | — | — | — | ↑ | —  | ↓  | —  | —  | 33           | 60            | 7            |
|                         | Playing ground           | — | ↓ | ↓ | ↓ | — | — | — | — | — | —  | ↓  | —  | —  | 27           | 73            | 0            |
|                         | Traditional songs        | ↓ | ↓ | ↓ | ↓ | ↓ | ↓ | ↓ | ↓ | ↓ | ↓  | ↓  | ↓  | ↓  | 100          | 0             | 0            |
|                         | Mental & physical health | ↑ | ↓ | ↓ | — | ↑ | — | — | ↑ | — | —  | ↓  | ↑  | —  | 27           | 47            | 27           |
| <b>Regulating NCP</b>   | Habitat and maintenance  | ↑ | — | ↓ | — | — | — | — | — | — | —  | ↓  | —  | —  | 7            | 87            | 7            |
|                         | Carbon storage           | ↑ | — | ↓ | — | — | — | — | — | — | —  | ↓  | —  | —  | 13           | 87            | 0            |

|                        |   |   |   |   |   |   |   |   |   |   |   |   |    |    |    |
|------------------------|---|---|---|---|---|---|---|---|---|---|---|---|----|----|----|
| Temperature regulation | ↑ | — | ↓ | — | — | — | — | — | — | ↓ | — | — | 13 | 87 | 0  |
| Protection of soil     | — | — | ↑ | — | — | — | — | — | — | ↑ | — | — | 0  | 73 | 27 |
| Water flow regulation  | — | — | ↓ | — | — | — | — | — | — | ↓ | — | — | 27 | 73 | 0  |

(↑: Increase, ↓: Decrease, —: No change).

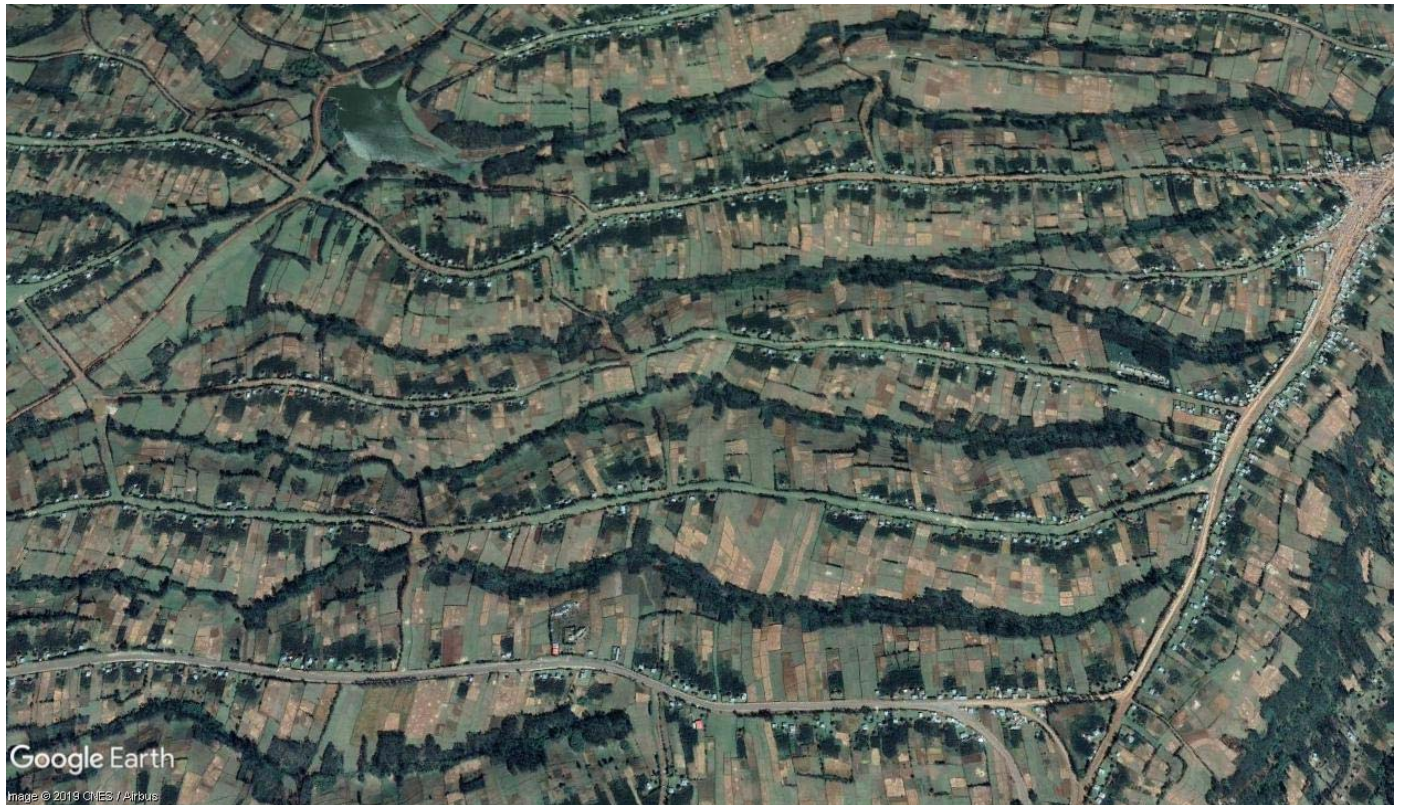

**Figure S1.** The Gurage socio-ecological landscape settlement pattern following the Jefoure roads (Source: Google Earth (2019)).



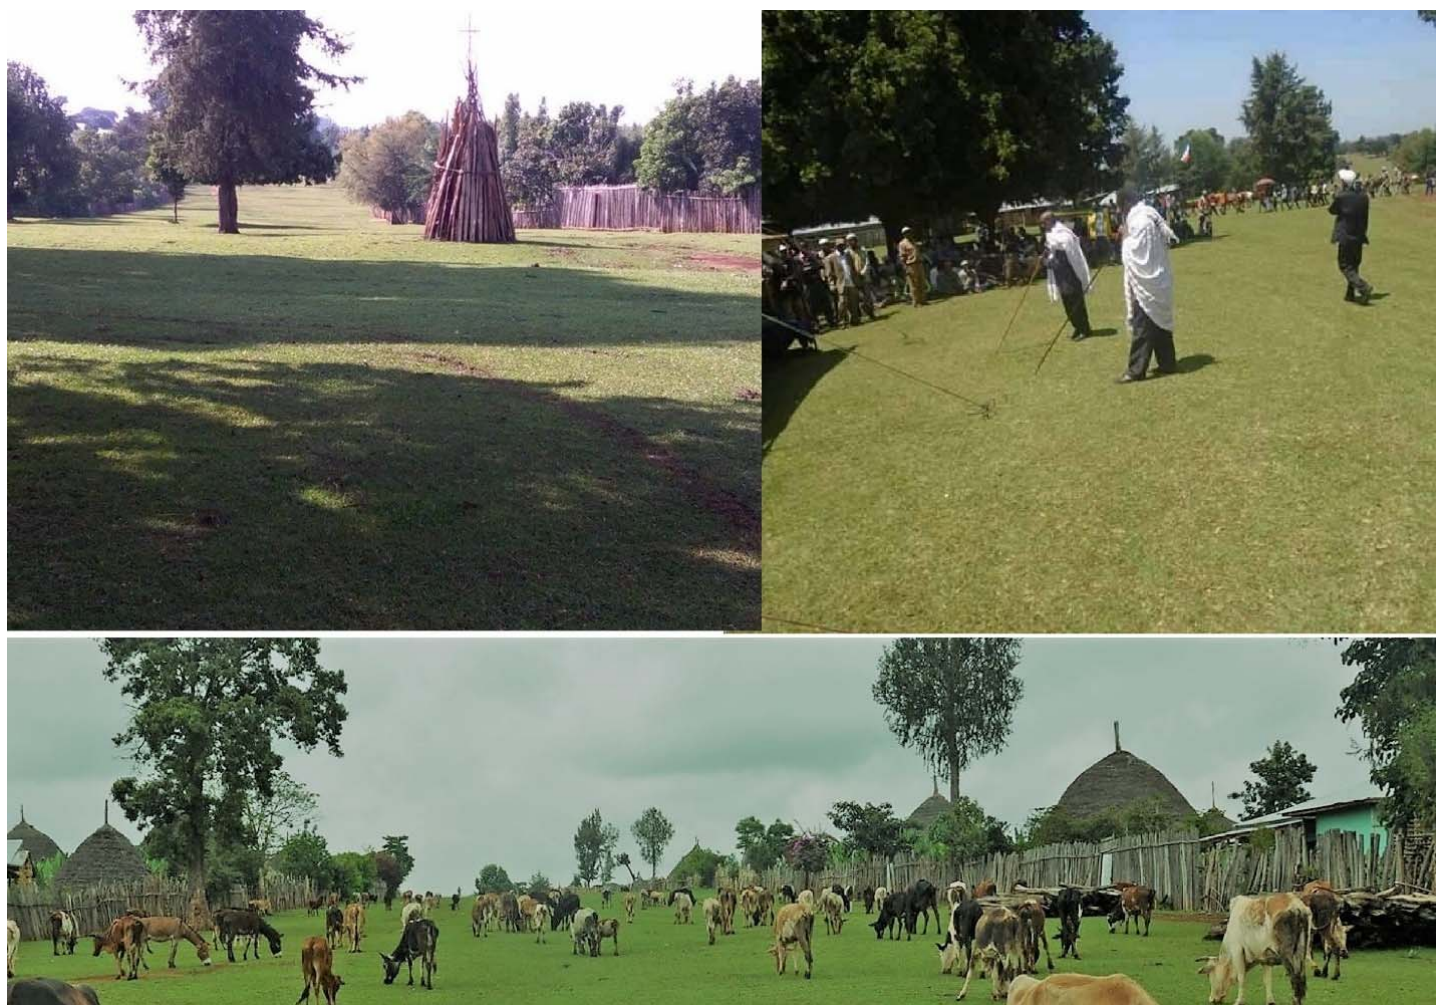

**Figure S2.** Socio-cultural practices that take place on Jefoure roads (source: Tourism Culture and Sport Office (Gurage zone)).
